# Supplementary material
Source: PubMed Central journal article supplement (PMC6625863)
Supplement: NIHMS1022420-supplement-Web_based_supplementary_materials.pdf [file NIHMS1022420-supplement-Web_based_supplementary_materials.pdf]

# Web-Based Supplementary Materials for Bias Induced by Ignoring Double Truncation Inherent in Autopsy-Confirmed Survival Studies of Neurodegenerative Diseases by Lior Rennert and Sharon X. Xie

August 16, 2018

## Web Appendix A

Here we justify that the identifiability constraints given in Section 2,  $a_{HL} < a_F \leq a_{HR}$  and  $b_{HL} \leq b_F < b_{HR}$ , hold in our data example. First we introduce some notation. Denote  $\tau$  as the end of study date,  $\tau_E$  as the study entry date, and  $\tau_A$  as the date of symptom onset. Note that  $\tau$  is the same for all subjects, while  $\tau_E$  and  $\tau_A$  can differ among subjects. The left truncation time is defined as  $L = \tau_E - \tau_A$ , and the right truncation time is defined as  $R = \tau - \tau_A$ .

Subjects can theoretically enter the center at the time of AD or FTLD symptom onset, but not before. Therefore the smallest possible left truncation time is  $L = 0$ , and thus  $a_{HL} = 0$ . Since recruitment of subjects into the center stops one week prior to the end of the study, the smallest possible right truncation time is  $R = 1$  week (or  $R \approx 0.019$  years). Therefore  $a_{HR} \geq 0.019$ . Since subjects can die from AD or FTLD within a week of symptom onset, and we assume that subjects cannot die on the day of symptom onset,  $P(T \leq t) > 0$  for some  $t \in (0, 0.019)$ , where  $t$  is measured in years. We therefore have that  $0 < a_F < 0.019$ , and thus the constraint  $a_{HL} < a_F \leq a_{HR}$  is satisfied.

Because subjects are not expected to enter the study more than 15 years after symptom onset,

the assumption  $b_{H_L} \leq 15$  is reasonable in practice. Since subjects with AD or FTLD can live past 15 years after symptom onset,  $P(T \geq 15) > 0$ , and thus  $b_F \geq 15$ . Our study recruited subjects from 1995 to 2012, and subjects with AD or FTLD symptom onset before 1995 were included in the study. Since the study recruited subjects over a 17 year period, we have that  $b_{H_R} = b_F + 17$  and thus  $b_F < b_{H_R}$ . To see why this is so, note that a subject with a survival time  $T = b_F$  could have theoretically had symptom onset in the year  $1995 - b_F$ . For example, if  $b_F = 15$ , a subject could have entered the study in 1980, in which case their right truncation time would be 32 years. Therefore it is reasonable to assume that the constraint  $b_{H_L} \leq b_F < b_{H_R}$  is satisfied.

### Notation for Web Tables 1,2,3, and 4

In the following tables,  $q_L, q_R, q$  are the proportion of observations missing due to left, right, and double (left and right) truncation, respectively, and  $n$  is the size of the observed sample.  $\hat{F}_{SP}$  denotes the SPMLE,  $\hat{F}_{NP}$  denotes the NPMLE, and  $\hat{F}_{emp}$  denotes the naïve empirical CDF which ignores double truncation. These estimators were all computed at  $t_{0.1}, \dots, t_{0.9}$ , the 1st through 9th deciles of the true survival distribution  $F_0$ . For a given estimator  $\hat{F}$ ,  $\text{Bias}(\hat{F})$  is the (absolute) difference between  $\hat{F}$  and  $F_0$ , averaged across the 9 deciles. The standard deviation of  $\hat{F}$  across simulations is  $\text{SD}(\hat{F})$  is,  $\widehat{\text{SE}}(\hat{F})$  is the estimated standard error of  $\hat{F}$ ,  $\text{MSE}(\hat{F})$  is the mean squared error of  $\hat{F}$ , and  $\text{Cov}(\hat{F})$  is 95% coverage, all averaged across the 9 deciles. The estimated median value based on  $\hat{F}$  is  $\hat{t}_{0.5}$ . The true median value based on  $F_0$  is  $t_{0.5} = 9.7$ ,  $\text{Bias}(\hat{t}_{0.5}) = \hat{t}_{0.5} - t_{0.5}$ , and  $\text{SD}(\hat{t}_{0.5})$  is the standard deviation of  $\hat{t}_{0.5}$  across simulations.

Web Table 1

Table 1: Simulation results under misspecification of the truncation distribution

Survival times simulated from a  $\text{gamma}(10, 1)$  distribution. Left and right truncation times assumed to come from a  $\text{gamma}(\alpha_1, \beta_1)$  and  $\text{gamma}(\alpha_2, \beta_2)$  distribution, respectively. Model A.1 corresponds to misspecification of the right truncation time by simulating it as  $\text{Unif}(0, 20)$ , and the left truncation time as  $\text{gamma}(4.5, 1.5)$ . Model A.2 corresponds to misspecification of the left truncation time by simulating it as  $\text{Weibull}(3, 9)$ , and the right truncation time as  $\text{gamma}(5, 2)$ . Model A.3 corresponds to misspecification both truncation times by simulating the left truncation time as  $\text{Weibull}(3, 9)$  and the right truncation time as  $\text{Unif}(0, 20)$ .

| Model | $q_L, q_R, q$    | $n$ | Estimator       | Bias( $\hat{F}$ ) | SD( $\hat{F}$ ) | $\widehat{\text{SE}}(\hat{F})$ | MSE( $\hat{F}$ ) | Cov( $\hat{F}$ ) | Bias( $\hat{t}_{0.5}$ ) | SD( $\hat{t}_{0.5}$ ) |
|-------|------------------|-----|-----------------|-------------------|-----------------|--------------------------------|------------------|------------------|-------------------------|-----------------------|
| A.1   | 0.22, 0.50, 0.64 | 50  | $\hat{F}_{SP}$  | 0.013             | 0.078           | 0.248                          | 0.006            | 0.974            | -0.060                  | 0.729                 |
|       |                  |     | $\hat{F}_{NP}$  | 0.025             | 0.080           | 0.073                          | 0.007            | 0.872            | -0.048                  | 0.796                 |
|       |                  |     | $\hat{F}_{emp}$ | 0.037             | 0.056           | 0.053                          | 0.005            | 0.484            | -0.259                  | 0.464                 |
| A.1   | 0.22, 0.50, 0.64 | 250 | $\hat{F}_{SP}$  | 0.013             | 0.034           | 0.083                          | 0.001            | 0.997            | -0.061                  | 0.316                 |
|       |                  |     | $\hat{F}_{NP}$  | 0.009             | 0.038           | 0.034                          | 0.002            | 0.927            | -0.050                  | 0.442                 |
|       |                  |     | $\hat{F}_{emp}$ | 0.037             | 0.024           | 0.024                          | 0.002            | 0.334            | -0.225                  | 0.205                 |
| A.2   | 0.33, 0.52, 0.74 | 50  | $\hat{F}_{SP}$  | 0.010             | 0.090           | 0.120                          | 0.008            | 0.885            | -0.008                  | 0.990                 |
|       |                  |     | $\hat{F}_{NP}$  | 0.023             | 0.098           | 0.086                          | 0.010            | 0.863            | 0.018                   | 1.079                 |
|       |                  |     | $\hat{F}_{emp}$ | 0.051             | 0.054           | 0.052                          | 0.006            | 0.462            | -0.292                  | 0.424                 |
| A.2   | 0.33, 0.52, 0.74 | 250 | $\hat{F}_{SP}$  | 0.009             | 0.040           | 0.036                          | 0.002            | 0.880            | -0.056                  | 0.342                 |
|       |                  |     | $\hat{F}_{NP}$  | 0.006             | 0.042           | 0.041                          | 0.002            | 0.928            | -0.023                  | 0.376                 |
|       |                  |     | $\hat{F}_{emp}$ | 0.051             | 0.025           | 0.023                          | 0.004            | 0.328            | -0.267                  | 0.189                 |
| A.3   | 0.33, 0.50, 0.70 | 50  | $\hat{F}_{SP}$  | 0.010             | 0.087           | 0.317                          | 0.008            | 0.967            | -0.090                  | 0.853                 |
|       |                  |     | $\hat{F}_{NP}$  | 0.023             | 0.090           | 0.081                          | 0.009            | 0.880            | -0.057                  | 0.936                 |
|       |                  |     | $\hat{F}_{emp}$ | 0.043             | 0.056           | 0.052                          | 0.006            | 0.478            | 0.259                   | 0.459                 |
| A.3   | 0.33, 0.50, 0.70 | 250 | $\hat{F}_{SP}$  | 0.012             | 0.037           | 0.098                          | 0.002            | 0.995            | -0.093                  | 0.331                 |
|       |                  |     | $\hat{F}_{NP}$  | 0.008             | 0.039           | 0.037                          | 0.002            | 0.922            | -0.037                  | 0.341                 |
|       |                  |     | $\hat{F}_{emp}$ | 0.043             | 0.025           | 0.024                          | 0.003            | 0.333            | 0.270                   | 0.205                 |

**Web Table 2**

Table 2: Simulation results when  $R = L + d_0$ .

Here  $d_0$  is constant. Survival times simulated from a  $\text{gamma}(10, 1)$  distribution. Left truncation time assumed to come from a  $\text{gamma}(\alpha_1, \beta_1)$  distribution. Model B.1 corresponds to correct specification of left truncation time by simulating  $L \sim \text{gamma}(4.5, 1.5)$  and right truncation time  $R \sim L + 6$ . Model B.2 corresponds to misspecification of the left truncation time by simulating it as  $\text{Weibull}(3, 9)$ , and  $R \sim L + 6$ . Model B.3 corresponds to correct specification of left truncation time by simulating  $L \sim \text{gamma}(4.5, 1.5)$  and right truncation time  $R \sim L + 8$ . Model B.4 corresponds to misspecification of the left truncation time by simulating it as  $\text{Weibull}(3, 9)$ , and  $R \sim L + 8$ .

| Model | $d_0$ | $q_L, q_R, q$    | $n$ | Estimator       | Bias( $\hat{F}$ ) | SD( $\hat{F}$ ) | $\widehat{\text{SE}}(\hat{F})$ | MSE( $\hat{F}$ ) | Cov( $\hat{F}$ ) | Bias( $\hat{t}_{0.5}$ ) | SD( $\hat{t}_{0.5}$ ) |
|-------|-------|------------------|-----|-----------------|-------------------|-----------------|--------------------------------|------------------|------------------|-------------------------|-----------------------|
| B.1   | 6     | 0.22, 0.26, 0.48 | 50  | $\hat{F}_{SP}$  | 0.008             | 0.105           | 0.070                          | 0.011            | 0.787            | 0.069                   | 1.167                 |
|       |       |                  |     | $\hat{F}_{NP}$  | 0.026             | 0.106           | 0.093                          | 0.012            | 0.824            | 0.070                   | 1.158                 |
|       |       |                  |     | $\hat{F}_{emp}$ | 0.067             | 0.055           | 0.050                          | 0.009            | 0.449            | -0.498                  | 0.408                 |
| B.1   | 6     | 0.22, 0.26, 0.48 | 250 | $\hat{F}_{SP}$  | 0.006             | 0.050           | 0.035                          | 0.003            | 0.828            | -0.016                  | 0.479                 |
|       |       |                  |     | $\hat{F}_{NP}$  | 0.008             | 0.051           | 0.050                          | 0.003            | 0.918            | -0.019                  | 0.473                 |
|       |       |                  |     | $\hat{F}_{emp}$ | 0.067             | 0.024           | 0.023                          | 0.007            | 0.297            | -0.479                  | 0.177                 |
| B.2   | 6     | 0.33, 0.17, 0.50 | 50  | $\hat{F}_{SP}$  | 0.009             | 0.098           | 0.069                          | 0.010            | 0.789            | 0.000                   | 0.920                 |
|       |       |                  |     | $\hat{F}_{NP}$  | 0.025             | 0.105           | 0.099                          | 0.012            | 0.868            | -0.011                  | 1.070                 |
|       |       |                  |     | $\hat{F}_{emp}$ | 0.055             | 0.053           | 0.051                          | 0.007            | 0.456            | 0.331                   | 0.418                 |
| B.2   | 6     | 0.33, 0.17, 0.50 | 250 | $\hat{F}_{SP}$  | 0.012             | 0.045           | 0.033                          | 0.002            | 0.802            | -0.046                  | 0.387                 |
|       |       |                  |     | $\hat{F}_{NP}$  | 0.006             | 0.050           | 0.049                          | 0.003            | 0.931            | -0.010                  | 0.455                 |
|       |       |                  |     | $\hat{F}_{emp}$ | 0.056             | 0.024           | 0.023                          | 0.005            | 0.327            | 0.351                   | 0.192                 |
| B.3   | 8     | 0.22, 0.14, 0.36 | 50  | $\hat{F}_{SP}$  | 0.003             | 0.083           | 0.068                          | 0.007            | 0.863            | 0.057                   | 0.812                 |
|       |       |                  |     | $\hat{F}_{NP}$  | 0.018             | 0.086           | 0.081                          | 0.008            | 0.879            | 0.053                   | 0.879                 |
|       |       |                  |     | $\hat{F}_{emp}$ | 0.040             | 0.054           | 0.051                          | 0.005            | 0.471            | 0.005                   | 0.427                 |
| B.3   | 8     | 0.22, 0.14, 0.36 | 250 | $\hat{F}_{SP}$  | 0.008             | 0.038           | 0.032                          | 0.002            | 0.892            | -0.048                  | 0.331                 |
|       |       |                  |     | $\hat{F}_{NP}$  | 0.009             | 0.038           | 0.040                          | 0.002            | 0.928            | -0.051                  | 0.328                 |
|       |       |                  |     | $\hat{F}_{emp}$ | 0.042             | 0.024           | 0.023                          | 0.003            | 0.333            | 0.009                   | 0.189                 |
| B.4   | 8     | 0.33, 0.08, 0.41 | 50  | $\hat{F}_{SP}$  | 0.006             | 0.085           | 0.068                          | 0.008            | 0.848            | -0.039                  | 0.790                 |
|       |       |                  |     | $\hat{F}_{NP}$  | 0.023             | 0.087           | 0.085                          | 0.008            | 0.901            | -0.080                  | 0.828                 |
|       |       |                  |     | $\hat{F}_{emp}$ | 0.077             | 0.053           | 0.050                          | 0.011            | 0.460            | 0.705                   | 0.453                 |
| B.4   | 8     | 0.33, 0.08, 0.41 | 250 | $\hat{F}_{SP}$  | 0.010             | 0.038           | 0.032                          | 0.002            | 0.861            | -0.056                  | 0.323                 |
|       |       |                  |     | $\hat{F}_{NP}$  | 0.009             | 0.040           | 0.040                          | 0.002            | 0.936            | -0.058                  | 0.347                 |
|       |       |                  |     | $\hat{F}_{emp}$ | 0.075             | 0.024           | 0.023                          | 0.008            | 0.304            | 0.701                   | 0.200                 |

### Web Table 3

Table 3: Simulation results under violation of the independence assumption

Survival and truncation times simulated from a normal copula with correlations  $\rho_{LT}$ ,  $\rho_{LR}$ , and  $\rho_{TR}$ , where  $\rho_{XY}$  denotes the correlation between random variables  $X$  and  $Y$ . The marginal distributions for the survival, left, and right truncation times are set to  $\text{gamma}(10, 1)$ ,  $\text{gamma}(4, 1.5)$ , and  $\text{gamma}(8, 1.5)$  distributions, respectively. The average observed sample size is  $n = 250$  for all models.

| Model | $\rho_{LT}, \rho_{LR}, \rho_{TR}$ | $q_L, q_R, q$      | Estimator       | Bias( $\hat{F}$ ) | SD( $\hat{F}$ ) | $\widehat{\text{SE}}(\hat{F})$ | MSE( $\hat{F}$ ) | Cov( $\hat{F}$ ) | Bias( $\hat{t}_{0.5}$ ) | SD( $\hat{t}_{0.5}$ ) |
|-------|-----------------------------------|--------------------|-----------------|-------------------|-----------------|--------------------------------|------------------|------------------|-------------------------|-----------------------|
| C.1   | 0.5, 0.1, 0.1                     | 0.00, 0.53, 0.0.53 | $\hat{F}_{SP}$  | 0.031             | 0.042           | 0.039                          | 0.003            | 0.865            | 0.373                   | 0.422                 |
|       |                                   |                    | $\hat{F}_{NP}$  | 0.027             | 0.043           | 0.040                          | 0.003            | 0.883            | 0.347                   | 0.454                 |
|       |                                   |                    | $\hat{F}_{emp}$ | 0.142             | 0.025           | 0.019                          | 0.023            | 0.331            | -1.294                  | 0.202                 |
| C.2   | -0.5, 0.1, -0.1                   | 0.04, 0.52, 0.56   | $\hat{F}_{SP}$  | 0.028             | 0.038           | 0.038                          | 0.003            | 0.847            | -0.236                  | 0.311                 |
|       |                                   |                    | $\hat{F}_{NP}$  | 0.028             | 0.039           | 0.037                          | 0.003            | 0.832            | -0.211                  | 0.319                 |
|       |                                   |                    | $\hat{F}_{emp}$ | 0.146             | 0.024           | 0.019                          | 0.025            | 0.331            | -1.295                  | 0.182                 |
| C.3   | -0.1, 0.1, -0.5                   | 0.02, 0.52, 0.54   | $\hat{F}_{SP}$  | 0.173             | 0.028           | 0.034                          | 0.034            | 0.048            | -1.436                  | 0.199                 |
|       |                                   |                    | $\hat{F}_{NP}$  | 0.174             | 0.028           | 0.027                          | 0.035            | 0.021            | -1.437                  | 0.204                 |
|       |                                   |                    | $\hat{F}_{emp}$ | 0.218             | 0.021           | 0.016                          | 0.054            | 0.235            | -1.786                  | 0.163                 |
| C.4   | -0.5, 0.1, -0.5                   | 0.04, 0.52, 0.56   | $\hat{F}_{SP}$  | 0.157             | 0.027           | 0.035                          | 0.030            | 0.134            | -1.301                  | 0.185                 |
|       |                                   |                    | $\hat{F}_{NP}$  | 0.157             | 0.027           | 0.027                          | 0.029            | 0.089            | -1.289                  | 0.190                 |
|       |                                   |                    | $\hat{F}_{emp}$ | 0.204             | 0.020           | 0.017                          | 0.050            | 0.246            | -1.663                  | 0.147                 |

Web Table 4

Table 4: Simulation results when  $R = L + d_0$  under violation of the independence assumption.

*Survival and left truncation times simulated from a normal copula with correlation  $\rho_{LT}$ . The marginal distributions for the survival times and left truncation times are set to gamma(10, 1) and gamma(4.5, 1.5), respectively. In all models, we simulate  $R = L + d_0$ , where  $d_0$  is constant. The average observed sample size is  $n = 250$  for all models.*

| Model | $d_0$ | $\rho_{LT}$ | $q_L, q_R, q$    | Estimator       | Bias( $\hat{F}$ ) | SD( $\hat{F}$ ) | $\widehat{SE}(\hat{F})$ | MSE( $\hat{F}$ ) | Cov( $\hat{F}$ ) | Bias( $\hat{t}_{0.5}$ ) | SD( $\hat{t}_{0.5}$ ) |
|-------|-------|-------------|------------------|-----------------|-------------------|-----------------|-------------------------|------------------|------------------|-------------------------|-----------------------|
| D.1   | 6     | -0.5        | 0.26, 0.31, 0.57 | $\hat{F}_{SP}$  | 0.060             | 0.035           | 0.029                   | 0.006            | 0.442            | -0.168                  | 0.234                 |
|       |       |             |                  | $\hat{F}_{NP}$  | 0.061             | 0.036           | 0.035                   | 0.006            | 0.525            | -0.160                  | 0.242                 |
|       |       |             |                  | $\hat{F}_{emp}$ | 0.098             | 0.020           | 0.020                   | 0.013            | 0.245            | -0.326                  | 0.139                 |
| D.2   | 6     | 0.5         | 0.14, 0.18, 0.33 | $\hat{F}_{SP}$  | 0.041             | 0.060           | 0.038                   | 0.006            | 0.724            | 0.416                   | 0.791                 |
|       |       |             |                  | $\hat{F}_{NP}$  | 0.035             | 0.060           | 0.059                   | 0.005            | 0.933            | 0.346                   | 0.724                 |
|       |       |             |                  | $\hat{F}_{emp}$ | 0.058             | 0.026           | 0.024                   | 0.005            | 0.353            | -0.530                  | 0.215                 |
| D.3   | 8     | -0.5        | 0.26, 0.19, 0.45 | $\hat{F}_{SP}$  | 0.055             | 0.030           | 0.027                   | 0.004            | 0.444            | 0.142                   | 0.214                 |
|       |       |             |                  | $\hat{F}_{NP}$  | 0.054             | 0.031           | 0.030                   | 0.004            | 0.487            | 0.154                   | 0.224                 |
|       |       |             |                  | $\hat{F}_{emp}$ | 0.081             | 0.021           | 0.021                   | 0.008            | 0.327            | 0.164                   | 0.157                 |
| D.4   | 8     | 0.5         | 0.14, 0.06, 0.21 | $\hat{F}_{SP}$  | 0.047             | 0.042           | 0.034                   | 0.005            | 0.639            | -0.432                  | 0.422                 |
|       |       |             |                  | $\hat{F}_{NP}$  | 0.048             | 0.043           | 0.044                   | 0.005            | 0.739            | -0.449                  | 0.428                 |
|       |       |             |                  | $\hat{F}_{emp}$ | 0.017             | 0.026           | 0.025                   | 0.001            | 0.336            | -0.092                  | 0.224                 |
